# Supplementary material
Source: bioRxiv or medRxiv preprint supplement (https://www.biorxiv.org/content/biorxiv/early/2019/03/19/498139/DC1/embed/media-1.pdf)
Supplement: Supplementary file [file media-1.pdf]

**Supporting Information for:**

**"Caterpillars on a phytochemical landscape" by Forister et al.**

Contents:

Supplemental phytochemical methods

Supporting Information Table S1: Details on individual compounds

Supporting Information Table S2: Results from lasso regression allowing for interactions

Supporting Information Fig. S1: Correlations among modules, SLA, protein and leaf toughness

Supporting Information Fig. S2a, S2b and S2c: Correlations within phytochemical modules

Supporting Information Fig. S3: Variation among plants in phytochemical modules

Supporting Information Fig. S4: Results from cross-validation and randomization experiments

Supporting Information Fig. S5: Frequency and magnitude of interactions by compound class

Supporting Information Fig. S6: Effects of specific compounds compared to coefficients of variation

## Supplemental phytochemical methods: LC-TOF analysis of foliar plant tissue

Foliar tissue was dried *in vacuo* and individual leaves were selected haphazardly from individual plants and finely ground (TissueLyser II, Quiagen; Hilden, Germany). Approximately 10 mg of ground foliar tissue was weighed and extracted in 2.00 ml of 70% aqueous ethanol, and briefly vortexed before 15 minutes of sonication. This suspension was centrifuged (500 rpm) for 10 min, then 1 ml aliquots of the supernatant were filtered through a 96-well filter (AcroPrep, 1 mL, 1  $\mu$ m glass fiber) into glass vial inserts and capped with a silicone mat before analysis. Chromatography was performed on an Agilent 1200 analytical HPLC equipped with a binary pump, autosampler, column compartment and diode array UV detector, coupled to an Agilent 6230 Time-of-Flight mass spectrometer via an electrospray ionization source (ESI-TOF; gas temperature: 325 °C, flow: 10 L/m; nebulizer pressure: 35 psig; VCap: 3500 V; fragmentor: 165 V; skimmer: 65 V; octopole: 750 V). Extracts (1.00  $\mu$ L) were co-injected with 0.50  $\mu$ L of digitoxin internal standard (0.200 mM, Sigma-Aldrich) and eluted at 0.500 mL/min through a Kinetex EVO C18 column (Phenomenex, 2.1 x 100 mm, 2.6  $\mu$ , 100 Å) at 40 °C. The linear binary gradient was comprised of buffers A (water containing 0.1 % formic acid) and B (acetonitrile containing 0.1 % formic acid) changing over 30 minutes accordingly: 0-1 min 5% B, ramp to 50% B at 4 min, ramp to 100% B at 21 min, 21-25 min 100% B ramping to 1.00 mL/min, before re-equilibrating the column from 25-30 min at 5% B, 0.5 mL/min.

Individual compounds were quantified relative to the digitoxin internal using Agilent MassHunter Quantitative Analysis. Putative phenolics (200-400 ppm) and saponins (400-650 ppm) were annotated using the relative mass defect (RMD) characteristic of each phytochemical family [1]. Compounds with RMD greater than 650 were presumed to be lipids or sterols. These assignments were revised by identifying presumed peptides based on even  $m/z$  features. Mass spectra of presumed phenolics, saponins and lipids were cross-referenced against the METLIN database [2] to further categorize annotations into phospholipids, vitamins (vitamin D derivatives), carotenoids, sterols, amino acids, alkaloids and sugars. One compound displayed an isotope distribution characteristic of a chlorinated structure and was designated as being halogenated. Due to the lack of structural information in ESI-TOF mass spectra, annotation beyond this classification was not possible.

## References

1. Ekanayaka EAP, Celiz MD, Jones AD. 2015 Relative mass defect filtering of mass spectra: a path to discovery of plant specialized metabolites. *Plant Physiol.* **167**, 1221–1232. (doi:10.1104/pp.114.251165)
2. Smith CA, O'Maille G, Want EJ, Qin C, Trauger SA, Brandon TR, Custodio DE, Abagyan R, Siuzdak G. 2005 METLIN: a metabolite mass spectral database. *Ther Drug Monit* **27**, 747–751.

**Table S1.** Details on individual compounds (numbered along the left column), including module numbers (see Fig. 1), chemical class assignments, ridge regression beta coefficients (for caterpillar survival, development time and adult weight as in Fig. 3), and mass spectra results:  $m/z$ , retention time (RT ave.) and relative mass defect (RMD). Compounds are organized by module number followed by compound number (an arbitrary designation).

| Cpd. | Module | Class             | Surv.    | Dev.    | Weight  | $m/z$     | RT ave.   | RMD  |
|------|--------|-------------------|----------|---------|---------|-----------|-----------|------|
| 65   | m. 0   | Phospholipid (PP) | 0.00026  | -0.1273 | 0.2072  | 299.2719  | 6.451733  | 909  |
| 180  | m. 0   | Sterol (St)       | 0.00067  | -0.0684 | 0.0740  | 485.3591  | 27.309711 | 740  |
| 23   | m. 1   | Peptide (Pe)      | 0.00065  | -0.0629 | 0.1109  | 492.2455  | 4.985533  | 499  |
| 30   | m. 1   | Alkaloid (Al)     | 0.00059  | 0.0172  | -0.0105 | 366.1097  | 5.301200  | 300  |
| 35   | m. 1   | Saponin (Sa)      | 0.00020  | 0.0112  | 0.1319  | 459.2233  | 5.533244  | 486  |
| 37   | m. 1   | Peptide (Pe)      | -0.00041 | 0.0073  | 0.1304  | 1564.7065 | 5.623800  | 452  |
| 50   | m. 1   | Peptide (Pe)      | -0.00048 | -0.0165 | 0.1683  | 1238.5847 | 5.966289  | 472  |
| 53   | m. 1   | Peptide (Pe)      | -0.00042 | -0.0301 | 0.0121  | 1106.5421 | 6.010844  | 490  |
| 57   | m. 1   | Peptide (Pe)      | -0.00183 | 0.0547  | 0.1034  | 256.2642  | 6.141222  | 1031 |
| 58   | m. 1   | Peptide (Pe)      | -0.00114 | -0.0546 | 0.1899  | 1192.5417 | 6.211267  | 454  |
| 63   | m. 1   | Phospholipid (PP) | -0.00320 | 0.0857  | -0.1410 | 518.3253  | 6.374000  | 628  |
| 64   | m. 1   | Peptide (Pe)      | -0.00053 | 0.0427  | 0.0425  | 562.322   | 6.399089  | 573  |
| 67   | m. 1   | Phospholipid (PP) | -0.00246 | -0.0880 | 0.0248  | 284.2959  | 6.617089  | 1041 |
| 70   | m. 1   | Peptide (Pe)      | 0.00052  | -0.0476 | 0.1226  | 1168.6682 | 7.022178  | 572  |
| 78   | m. 1   | Peptide (Pe)      | 0.00060  | 0.0464  | -0.0439 | 694.402   | 7.380578  | 579  |
| 84   | m. 1   | Phospholipid (PP) | 0.00100  | -0.0265 | 0.0137  | 293.2112  | 8.701933  | 720  |
| 89   | m. 1   | Phospholipid (PP) | -0.00032 | -0.0165 | 0.0532  | 546.3438  | 10.332689 | 629  |
| 93   | m. 1   | Alkaloid (Al)     | -0.00029 | -0.0176 | 0.0149  | 358.2468  | 10.897978 | 689  |
| 95   | m. 1   | Lipid (Li)        | 0.00168  | 0.0453  | 0.0941  | 425.2903  | 11.479511 | 683  |
| 111  | m. 1   | Alkaloid (Al)     | -0.00022 | 0.0119  | 0.0602  | 592.5035  | 15.707178 | 850  |
| 113  | m. 1   | Sterol (St)       | 0.00100  | 0.0130  | -0.0143 | 661.3032  | 15.991800 | 458  |
| 128  | m. 1   | Peptide (Pe)      | -0.00269 | 0.0354  | -0.0869 | 584.4235  | 17.597156 | 725  |
| 129  | m. 1   | Peptide (Pe)      | -0.00106 | -0.0033 | -0.0254 | 567.4209  | 17.818844 | 742  |
| 136  | m. 1   | Peptide (Pe)      | 0.00051  | 0.0017  | 0.0215  | 932.6342  | 18.698356 | 680  |
| 139  | m. 1   | Phospholipid (PP) | 0.00205  | 0.0077  | -0.0888 | 792.5648  | 18.853422 | 713  |
| 146  | m. 1   | Sterol (St)       | -0.00004 | -0.0499 | -0.0437 | 451.3596  | 20.131378 | 797  |
| 149  | m. 1   | Phospholipid (PP) | -0.00047 | 0.0087  | -0.0978 | 784.5599  | 20.769978 | 714  |
| 157  | m. 1   | Sterol (St)       | 0.00117  | 0.0258  | 0.0326  | 429.3741  | 21.812222 | 871  |
| 160  | m. 1   | Phospholipid (PP) | -0.00322 | 0.0023  | -0.1929 | 747.6095  | 21.920444 | 815  |
| 161  | m. 1   | Phospholipid (PP) | 0.00061  | 0.0140  | -0.2701 | 552.4296  | 22.245667 | 778  |
| 162  | m. 1   | Phospholipid (PP) | -0.00307 | 0.0165  | -0.1205 | 907.5367  | 22.382756 | 591  |
| 163  | m. 1   | Peptide (Pe)      | -0.00153 | -0.0016 | -0.1119 | 886.5581  | 22.381711 | 630  |
| 164  | m. 1   | Peptide (Pe)      | 0.00277  | -0.0499 | 0.1871  | 830.676   | 22.432867 | 814  |
| 165  | m. 1   | Lipid (Li)        | 0.00398  | -0.0385 | 0.0233  | 537.5365  | 22.754333 | 998  |
| 167  | m. 1   | Phospholipid (PP) | 0.00199  | 0.0207  | 0.0001  | 708.5134  | 23.041267 | 725  |
| 169  | m. 1   | Lipid (Li)        | 0.00100  | 0.0316  | 0.0242  | 565.5681  | 23.807289 | 1004 |
| 170  | m. 1   | Phospholipid (PP) | 0.00214  | -0.0376 | -0.0473 | 885.5552  | 24.037489 | 627  |
| 171  | m. 1   | Lipid (Li)        | 0.00310  | 0.0220  | 0.0281  | 536.4387  | 24.087178 | 818  |
| 172  | m. 1   | Phospholipid (PP) | 0.00194  | -0.0314 | -0.0176 | 869.559   | 24.216778 | 643  |
| 173  | m. 1   | Phospholipid (PP) | -0.00145 | -0.1120 | 0.0485  | 787.427   | 24.262511 | 542  |
| 175  | m. 1   | Pigment (Pi)      | 0.00138  | -0.0712 | -0.1041 | 871.5766  | 24.897822 | 662  |
| 177  | m. 1   | Lipid (Li)        | -0.00052 | 0.0206  | 0.0080  | 208.1347  | 27.036422 | 647  |
| 18   | m. 2   | Phen. glyco. (Pg) | -0.00246 | -0.0574 | 0.0201  | 323.0738  | 4.163533  | 228  |
| 33   | m. 2   | Phen. glyco. (Pg) | -0.00040 | -0.0210 | -0.0409 | 493.1329  | 5.430044  | 505  |
| 69   | m. 2   | Peptide (Pe)      | 0.00001  | -0.0226 | -0.0657 | 1018.537  | 6.846578  | 527  |
| 92   | m. 2   | Lipid (Li)        | 0.00220  | -0.0455 | 0.1122  | 375.2549  | 10.640356 | 679  |
| 94   | m. 2   | Peptide (Pe)      | 0.00041  | -0.1458 | 0.0496  | 618.4291  | 11.238667 | 694  |
| 99   | m. 2   | Alkaloid (Al)     | -0.00001 | -0.0174 | -0.0306 | 618.4291  | 12.470689 | 694  |
| 100  | m. 2   | Peptide (Pe)      | 0.00235  | -0.0290 | -0.0485 | 600.4193  | 13.376289 | 698  |
| 101  | m. 2   | Alkaloid (Al)     | 0.00040  | -0.0528 | 0.0074  | 618.4291  | 13.049600 | 694  |
| 103  | m. 2   | Peptide (Pe)      | -0.00012 | -0.0534 | -0.0377 | 603.4311  | 13.358222 | 714  |
| 104  | m. 2   | Peptide (Pe)      | 0.00242  | -0.0386 | -0.0329 | 600.4193  | 13.376289 | 698  |
| 109  | m. 2   | Peptide (Pe)      | 0.00025  | -0.0441 | 0.0031  | 600.4193  | 15.398533 | 698  |

|     |      |                   |          |         |         |           |           |      |
|-----|------|-------------------|----------|---------|---------|-----------|-----------|------|
| 112 | m. 2 | Peptide (Pe)      | -0.00036 | 0.0008  | -0.0056 | 600.4193  | 15.860356 | 698  |
| 114 | m. 2 | Peptide (Pe)      | 0.00337  | 0.0671  | 0.0466  | 584.4235  | 16.288622 | 725  |
| 122 | m. 2 | Peptide (Pe)      | 0.00642  | 0.0166  | 0.1315  | 584.4235  | 16.758622 | 725  |
| 133 | m. 2 | Phospholipid (PP) | -0.00094 | 0.0888  | -0.1533 | 716.5243  | 18.284733 | 732  |
| 134 | m. 2 | Peptide (Pe)      | 0.00260  | 0.0043  | 0.0275  | 568.4294  | 18.417311 | 755  |
| 135 | m. 2 | Peptide (Pe)      | -0.00007 | -0.0027 | 0.0696  | 937.5896  | 18.675222 | 629  |
| 154 | m. 2 | Sterol (St)       | 0.00435  | -0.1104 | 0.0743  | 693.425   | 21.485978 | 613  |
| 155 | m. 2 | Phospholipid (PP) | 0.00395  | -0.0670 | 0.0774  | 635.3816  | 21.488511 | 601  |
| 166 | m. 2 | Pigment (Pi)      | -0.00396 | 0.0522  | -0.0076 | 871.5766  | 22.912311 | 662  |
| 168 | m. 2 | Peptide (Pe)      | 0.00091  | -0.0479 | 0.0062  | 1057.7337 | 23.685733 | 694  |
| 2   | m. 3 | Halogen (Ha)      | -0.00085 | 0.0590  | 0.0426  | 199.0946  | 0.546622  | 475  |
| 5   | m. 3 | Alkaloid (Al)     | -0.00443 | 0.0446  | -0.0332 | 217.0692  | 0.628311  | 485  |
| 6   | m. 3 | Peptide (Pe)      | -0.00292 | -0.0089 | 0.0744  | 309.1795  | 0.638667  | 581  |
| 7   | m. 3 | Sugar (Su)        | -0.00441 | 0.0855  | -0.1219 | 365.1066  | 0.653400  | 292  |
| 9   | m. 3 | Alkaloid (Al)     | -0.00708 | 0.0404  | -0.0229 | 321.1156  | 0.696467  | 360  |
| 12  | m. 3 | Alkaloid (Al)     | -0.00114 | 0.0704  | -0.1614 | 186.0765  | 0.831267  | 411  |
| 13  | m. 3 | Alkaloid (Al)     | -0.00088 | 0.0796  | -0.1770 | 140.071   | 0.843044  | 1008 |
| 14  | m. 3 | Peptide (Pe)      | -0.00221 | 0.0548  | -0.0971 | 225.0855  | 1.036511  | 380  |
| 34  | m. 3 | Phospholipid (PP) | -0.00396 | -0.0466 | -0.0396 | 547.3472  | 5.507867  | 634  |
| 38  | m. 3 | Saponin (Sa)      | -0.00193 | 0.0677  | -0.0541 | 633.348   | 5.635956  | 549  |
| 41  | m. 3 | Saponin (Sa)      | -0.00335 | -0.1640 | 0.1125  | 471.3488  | 5.634111  | 740  |
| 42  | m. 3 | Saponin (Sa)      | -0.00151 | 0.0292  | -0.1282 | 631.3333  | 5.725444  | 816  |
| 45  | m. 3 | Saponin (Sa)      | -0.00020 | -0.1281 | 0.1960  | 1105.5828 | 5.781400  | 527  |
| 55  | m. 3 | Saponin (Sa)      | -0.00096 | -0.1231 | -0.1934 | 617.3527  | 6.043333  | 678  |
| 62  | m. 3 | Saponin (Sa)      | -0.00139 | -0.0482 | -0.1629 | 825.4299  | 6.314022  | 521  |
| 120 | m. 3 | Phospholipid (PP) | -0.00122 | -0.0073 | -0.0314 | 732.5644  | 16.529933 | 770  |
| 141 | m. 3 | Phospholipid (PP) | -0.00302 | -0.0398 | 0.0321  | 963.6051  | 18.994089 | 628  |
| 143 | m. 3 | Phospholipid (PP) | -0.00352 | 0.0180  | 0.0291  | 951.6048  | 19.629644 | 636  |
| 174 | m. 3 | Phospholipid (PP) | -0.00473 | 0.0474  | -0.0259 | 805.6846  | 23.370044 | 759  |
| 27  | m. 4 | Phen. glyco. (Pg) | 0.00157  | -0.0575 | 0.1663  | 441.2984  | 5.217978  | 676  |
| 80  | m. 4 | Phospholipid (PP) | 0.00323  | -0.0657 | 0.1113  | 518.3253  | 7.756911  | 628  |
| 83  | m. 4 | Phospholipid (PP) | 0.00205  | 0.0001  | 0.0979  | 520.3405  | 8.404400  | 654  |
| 85  | m. 4 | Phospholipid (PP) | 0.00189  | -0.0632 | -0.0102 | 454.2938  | 8.763000  | 647  |
| 86  | m. 4 | Phospholipid (PP) | 0.00389  | -0.0043 | -0.0528 | 496.3412  | 8.889378  | 687  |
| 91  | m. 4 | Phospholipid (PP) | 0.00532  | 0.0847  | 0.1361  | 524.3727  | 10.499178 | 711  |
| 140 | m. 4 | Phospholipid (PP) | 0.00237  | -0.0266 | -0.0049 | 797.5204  | 18.879244 | 653  |
| 142 | m. 4 | Phospholipid (PP) | -0.00099 | 0.0177  | 0.0110  | 714.5088  | 19.293533 | 711  |
| 144 | m. 4 | Phospholipid (PP) | -0.00135 | 0.0014  | 0.0366  | 756.5562  | 19.707467 | 735  |
| 148 | m. 4 | Phospholipid (PP) | -0.00123 | 0.0070  | 0.0349  | 716.525   | 20.684533 | 732  |
| 151 | m. 4 | Phospholipid (PP) | -0.00066 | 0.0324  | -0.0100 | 801.5511  | 20.976333 | 688  |
| 153 | m. 4 | Phospholipid (PP) | -0.00212 | 0.0224  | 0.0440  | 758.5721  | 21.488156 | 754  |
| 159 | m. 4 | Phospholipid (PP) | 0.00041  | 0.1169  | 0.0507  | 803.5978  | 22.069778 | 744  |
| 4   | m. 5 | Alkaloid (Al)     | 0.00060  | -0.0718 | 0.0563  | 104.1077  | 0.595533  | 1035 |
| 8   | m. 5 | Alkaloid (Al)     | 0.00026  | 0.0377  | 0.0717  | 144.1024  | 0.663689  | 711  |
| 10  | m. 5 | Lipid (Li)        | 0.00096  | 0.0048  | -0.0902 | 301.2133  | 0.700111  | 708  |
| 11  | m. 5 | Alkaloid (Al)     | 0.00122  | -0.0359 | -0.0768 | 158.1181  | 0.705733  | 747  |
| 15  | m. 5 | Peptide (Pe)      | 0.00110  | -0.0136 | 0.1019  | 188.0714  | 2.198778  | 380  |
| 22  | m. 5 | Phen. glyco. (Pg) | 0.00349  | -0.1477 | 0.1581  | 623.1272  | 5.055600  | 506  |
| 32  | m. 5 | Phen. glyco. (Pg) | -0.00083 | 0.0498  | -0.1267 | 507.1149  | 5.435600  | 638  |
| 54  | m. 5 | Peptide (Pe)      | 0.00129  | 0.0416  | -0.0698 | 351.2153  | 6.034822  | 613  |
| 87  | m. 5 | Peptide (Pe)      | 0.00284  | 0.0082  | -0.1526 | 1455.421  | 9.179689  | 57   |
| 96  | m. 5 | Phospholipid (PP) | 0.00240  | -0.0021 | 0.0564  | 377.2674  | 11.743289 | 691  |
| 97  | m. 5 | Lipid (Li)        | 0.00167  | 0.0404  | -0.0329 | 279.2328  | 11.961267 | 834  |
| 102 | m. 5 | Lipid (Li)        | 0.00128  | 0.0511  | -0.0726 | 281.2485  | 13.161200 | 884  |
| 124 | m. 5 | Peptide (Pe)      | 0.00173  | 0.0786  | -0.1331 | 1099.6413 | 16.987733 | 583  |
| 49  | m. 6 | Alkaloid (Al)     | 0.00323  | 0.0532  | 0.1335  | 445.369   | 5.779267  | 829  |
| 98  | m. 6 | Saponin (Sa)      | 0.00015  | -0.0269 | -0.0464 | 607.2933  | 12.283867 | 483  |
| 107 | m. 6 | Phospholipid (PP) | -0.00005 | -0.0122 | -0.0705 | 593.2777  | 14.143022 | 468  |
| 108 | m. 6 | Sterol (St)       | -0.00004 | -0.0533 | -0.0551 | 621.3084  | 14.628844 | 496  |
| 110 | m. 6 | Peptide (Pe)      | 0.00014  | -0.0388 | -0.0504 | 635.3816  | 15.485111 | 601  |
| 121 | m. 6 | Phospholipid (PP) | -0.00057 | -0.0485 | -0.0593 | 607.2933  | 16.585889 | 483  |
| 126 | m. 6 | Phospholipid (PP) | -0.00031 | -0.0179 | -0.0777 | 621.3084  | 17.422600 | 496  |

|     |       |                   |          |         |         |           |           |     |
|-----|-------|-------------------|----------|---------|---------|-----------|-----------|-----|
| 132 | m. 6  | Peptide (Pe)      | -0.00042 | -0.0410 | -0.1018 | 635.3816  | 18.238778 | 601 |
| 66  | m. 7  | Saponin (Sa)      | -0.00238 | 0.0110  | -0.0479 | 1087.5707 | 6.218867  | 525 |
| 68  | m. 7  | Saponin (Sa)      | 0.00025  | -0.0381 | 0.0862  | 943.529   | 6.721333  | 561 |
| 74  | m. 7  | Saponin (Sa)      | 0.00259  | -0.0129 | 0.0691  | 585.4277  | 7.205911  | 731 |
| 75  | m. 7  | Saponin (Sa)      | 0.00227  | -0.0067 | 0.0576  | 907.5367  | 7.203356  | 591 |
| 76  | m. 7  | Saponin (Sa)      | 0.00190  | 0.0480  | 0.0452  | 1069.5625 | 7.218822  | 526 |
| 79  | m. 7  | Saponin (Sa)      | -0.00375 | -0.0688 | -0.0314 | 923.5027  | 7.572822  | 544 |
| 81  | m. 7  | Phospholipid (PP) | 0.00063  | 0.0602  | -0.0630 | 277.2167  | 8.279133  | 782 |
| 82  | m. 7  | Phospholipid (PP) | 0.00058  | 0.0288  | -0.0403 | 317.209   | 8.321022  | 659 |
| 31  | m. 8  | Phen. glyco. (Pg) | 0.00117  | -0.0678 | -0.1842 | 684.2517  | 5.347200  | 368 |
| 40  | m. 8  | Saponin (Sa)      | 0.00123  | 0.1758  | 0.0983  | 1119.5627 | 5.806133  | 503 |
| 43  | m. 8  | Saponin (Sa)      | 0.00055  | 0.0050  | 0.0909  | 973.504   | 5.631911  | 518 |
| 46  | m. 8  | Saponin (Sa)      | 0.00093  | 0.0569  | -0.2069 | 989.4993  | 5.818644  | 505 |
| 47  | m. 8  | Saponin (Sa)      | 0.00173  | -0.1150 | 0.0430  | 843.4409  | 5.873844  | 523 |
| 52  | m. 8  | Saponin (Sa)      | 0.00121  | -0.0305 | 0.1098  | 973.504   | 6.013467  | 518 |
| 56  | m. 8  | Saponin (Sa)      | 0.00285  | -0.0381 | 0.0958  | 827.4455  | 6.058733  | 538 |
| 16  | m. 9  | Peptide (Pe)      | -0.00141 | -0.0005 | 0.0386  | 141.0881  | 3.049089  | 624 |
| 19  | m. 9  | Alkaloid (Al)     | 0.00186  | 0.0813  | 0.0131  | 422.1973  | 4.658444  | 467 |
| 72  | m. 9  | Peptide (Pe)      | -0.00253 | 0.0377  | -0.0505 | 1170.1459 | 7.037956  | 125 |
| 73  | m. 9  | Saponin (Sa)      | -0.00558 | -0.0807 | 0.0211  | 402.1992  | 7.065644  | 495 |
| 125 | m. 9  | Peptide (Pe)      | -0.00057 | 0.1016  | 0.1027  | 584.4235  | 16.991733 | 725 |
| 181 | m. 9  | Halogen (Ha)      | -0.00116 | 0.0197  | -0.0283 | 127.1233  | 27.473089 | 970 |
| 117 | m. 10 | Peptide (Pe)      | 0.00509  | 0.0172  | 0.0481  | 595.2837  | 16.515511 | 477 |
| 118 | m. 10 | Peptide (Pe)      | 0.00425  | 0.0036  | 0.0906  | 613.4849  | 16.515178 | 790 |
| 137 | m. 10 | Sterol (St)       | 0.00234  | -0.0163 | 0.0588  | 335.2595  | 18.765067 | 774 |
| 138 | m. 10 | Phospholipid (PP) | 0.00259  | -0.0120 | 0.0542  | 613.4849  | 18.837933 | 790 |
| 150 | m. 10 | Phospholipid (PP) | 0.00178  | -0.0083 | 0.0982  | 775.535   | 20.840600 | 690 |
| 39  | m. 11 | Saponin (Sa)      | 0.00214  | -0.1306 | 0.0287  | 527.2482  | 5.672422  | 471 |
| 176 | m. 11 | Phospholipid (PP) | 0.00557  | -0.0410 | 0.0270  | 861.4798  | 26.956867 | 557 |
| 178 | m. 11 | Phospholipid (PP) | 0.00338  | -0.0390 | -0.0627 | 835.5451  | 27.192933 | 652 |
| 179 | m. 11 | Phospholipid (PP) | 0.00517  | -0.0743 | -0.0850 | 834.5424  | 27.162333 | 650 |
| 20  | m. 12 | Saponin (Sa)      | 0.00021  | 0.0792  | 0.1608  | 409.1823  | 4.755400  | 313 |
| 21  | m. 12 | Phen. glyco. (Pg) | -0.00217 | -0.0762 | -0.1660 | 481.2056  | 4.897222  | 427 |
| 24  | m. 12 | Peptide (Pe)      | 0.00115  | 0.0097  | 0.1753  | 374.1461  | 5.014222  | 390 |
| 25  | m. 12 | Saponin (Sa)      | 0.00127  | 0.0686  | -0.1764 | 475.2191  | 5.100889  | 461 |
| 48  | m. 12 | Peptide (Pe)      | 0.00290  | 0.0146  | -0.1820 | 728.3151  | 5.887111  | 433 |
| 60  | m. 12 | Saponin (Sa)      | 0.00040  | -0.1856 | 0.3557  | 959.5744  | 6.105156  | 599 |
| 116 | m. 12 | Peptide (Pe)      | 0.00237  | -0.0299 | 0.0653  | 959.5744  | 16.460289 | 599 |
| 147 | m. 12 | Peptide (Pe)      | 0.00043  | 0.0889  | 0.0042  | 965.6208  | 20.478333 | 643 |
| 26  | m. 13 | Phen. glyco. (Pg) | -0.00424 | 0.1468  | 0.0130  | 683.1501  | 5.126178  | 215 |
| 51  | m. 13 | Saponin (Sa)      | 0.00026  | -0.0548 | 0.0378  | 915.4514  | 5.947444  | 659 |
| 61  | m. 13 | Saponin (Sa)      | 0.00113  | 0.0149  | -0.0740 | 351.2153  | 6.255356  | 613 |
| 88  | m. 13 | Lipid (Li)        | 0.00097  | 0.0176  | -0.0429 | 383.2564  | 9.921756  | 669 |
| 105 | m. 13 | Lipid (Li)        | -0.00173 | -0.0380 | -0.0770 | 613.4839  | 13.432956 | 790 |
| 158 | m. 13 | Phospholipid (PP) | 0.00100  | 0.0318  | -0.0148 | 816.6582  | 21.926822 | 806 |
| 145 | m. 14 | Peptide (Pe)      | 0.00156  | 0.0153  | 0.2906  | 939.5958  | 19.884289 | 634 |
| 152 | m. 14 | Phospholipid (PP) | -0.00445 | 0.1972  | -0.1885 | 941.6201  | 21.136822 | 659 |
| 156 | m. 14 | Sterol (St)       | -0.00212 | -0.0755 | 0.1265  | 427.3947  | 21.699578 | 924 |

**Table S2.** Compounds and coefficients from lasso regression allowing for possible effects of all individual compounds (as in Fig. 2) as well as all pairwise interactions among compounds. Listed here are interactions selected by lasso regression, using binomial and Gaussian regressions for survival and adult weight, respectively (with units on those scales, as in Table S1). Results for development time are not shown here as none of the potential interactions for development time were selected by lasso regression.

| Survival regression |             | Weight regression |             |                   |             |
|---------------------|-------------|-------------------|-------------|-------------------|-------------|
| Compounds           | Coefficient | Compounds         | Coefficient | Compounds         | Coefficient |
| cpd.9               | -0.080      | cpd.25            | -0.085      | cpd.43 x cpd.47   | -0.030      |
| cpd.122             | 0.067       | cpd.49            | 0.0081      | cpd.49 x cpd.138  | 0.051       |
| cpd.154             | 0.0078      | cpd.5 x cpd.7     | -0.10       | cpd.55 x cpd.79   | -0.025      |
| cpd.5 x cpd.6       | -0.042      | cpd.5 x cpd.9     | -0.059      | cpd.60 x cpd.65   | 0.016       |
| cpd.5 x cpd.7       | -0.0095     | cpd.8 x cpd.11    | -0.018      | cpd.60 x cpd.79   | -0.048      |
| cpd.6 x cpd.34      | -0.024      | cpd.12 x cpd.152  | 0.019       | cpd.60 x cpd.132  | -0.080      |
| cpd.6 x cpd.79      | -0.11       | cpd.14 x cpd.91   | 0.11        | cpd.65 x cpd.133  | -0.22       |
| cpd.7 x cpd.133     | 0.078       | cpd.18 x cpd.73   | -0.18       | cpd.85 x cpd.161  | 0.16        |
| cpd.19 x cpd.54     | -0.0063     | cpd.18 x cpd.79   | 0.0048      | cpd.86 x cpd.141  | 0.052       |
| cpd.21 x cpd.60     | -0.038      | cpd.19 x cpd.85   | -0.024      | cpd.88 x cpd.118  | 0.063       |
| cpd.45 x cpd.54     | 0.00024     | cpd.19 x cpd.124  | 0.013       | cpd.91 x cpd.122  | -0.062      |
| cpd.48 x cpd.142    | 0.019       | cpd.23 x cpd.24   | -0.011      | cpd.95 x cpd.175  | -0.011      |
| cpd.61 x cpd.82     | -0.034      | cpd.25 x cpd.60   | 0.086       | cpd.105 x cpd.125 | 0.024       |
| cpd.62 x cpd.79     | -0.010      | cpd.25 x cpd.117  | -0.019      | cpd.105 x cpd.152 | -0.090      |
| cpd.83 x cpd.164    | -0.017      | cpd.25 x cpd.145  | -0.078      | cpd.117 x cpd.149 | -0.10       |
| cpd.99 x cpd.109    | -0.039      | cpd.32 x cpd.66   | -0.37       | cpd.117 x cpd.156 | 0.047       |
| cpd.152 x cpd.174   | -0.18       | cpd.34 x cpd.94   | 0.00025     | cpd.121 x cpd.140 | 0.25        |
|                     |             | cpd.35 x cpd.49   | -0.062      | cpd.125 x cpd.148 | 0.0035      |
|                     |             | cpd.41 x cpd.179  | 0.144       | cpd.124 x cpd.176 | 0.13        |

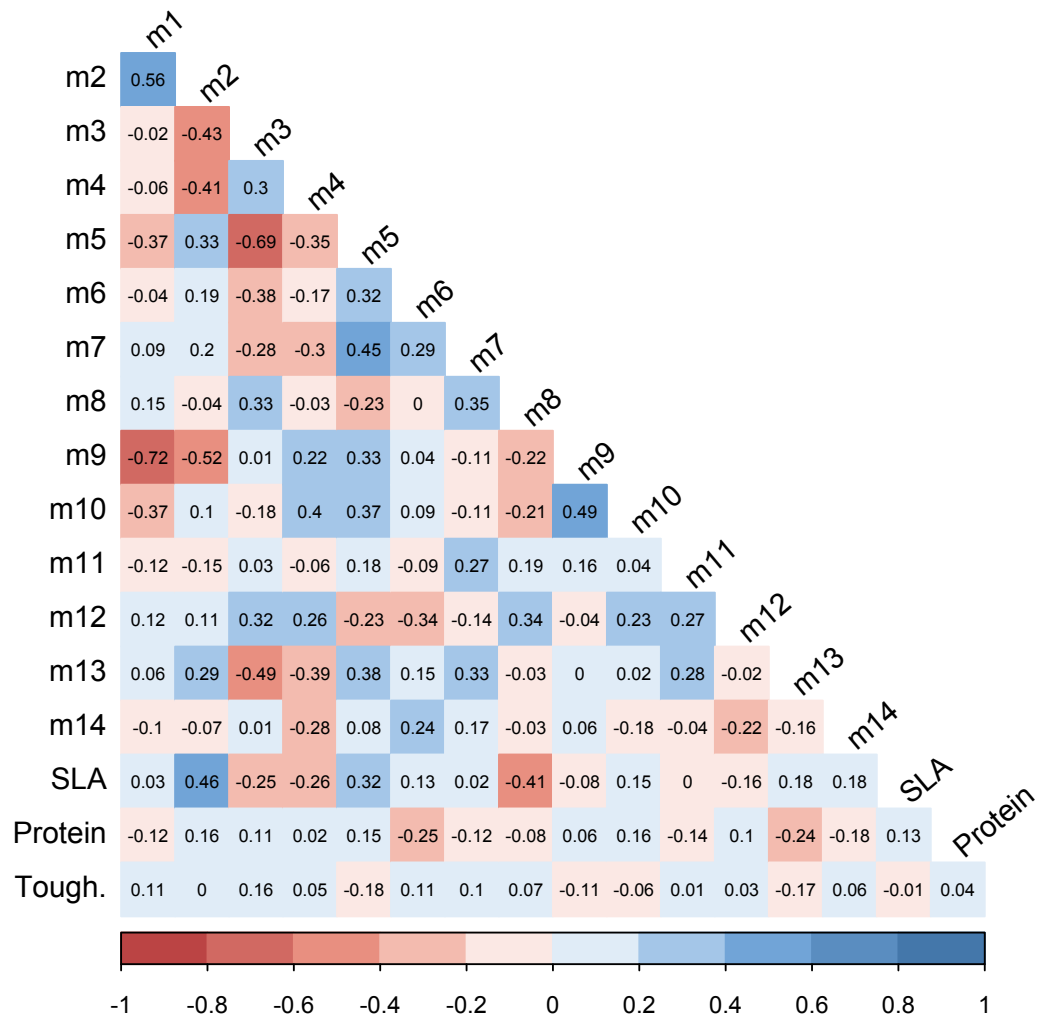

**Fig. S1.** Pairwise correlations between phytochemical modules (represented by eigenvectors m1, m2, etc.) and plant traits specific leaf area (SLA), protein and leaf toughness. Values shown are Pearson product-moment correlation coefficients.



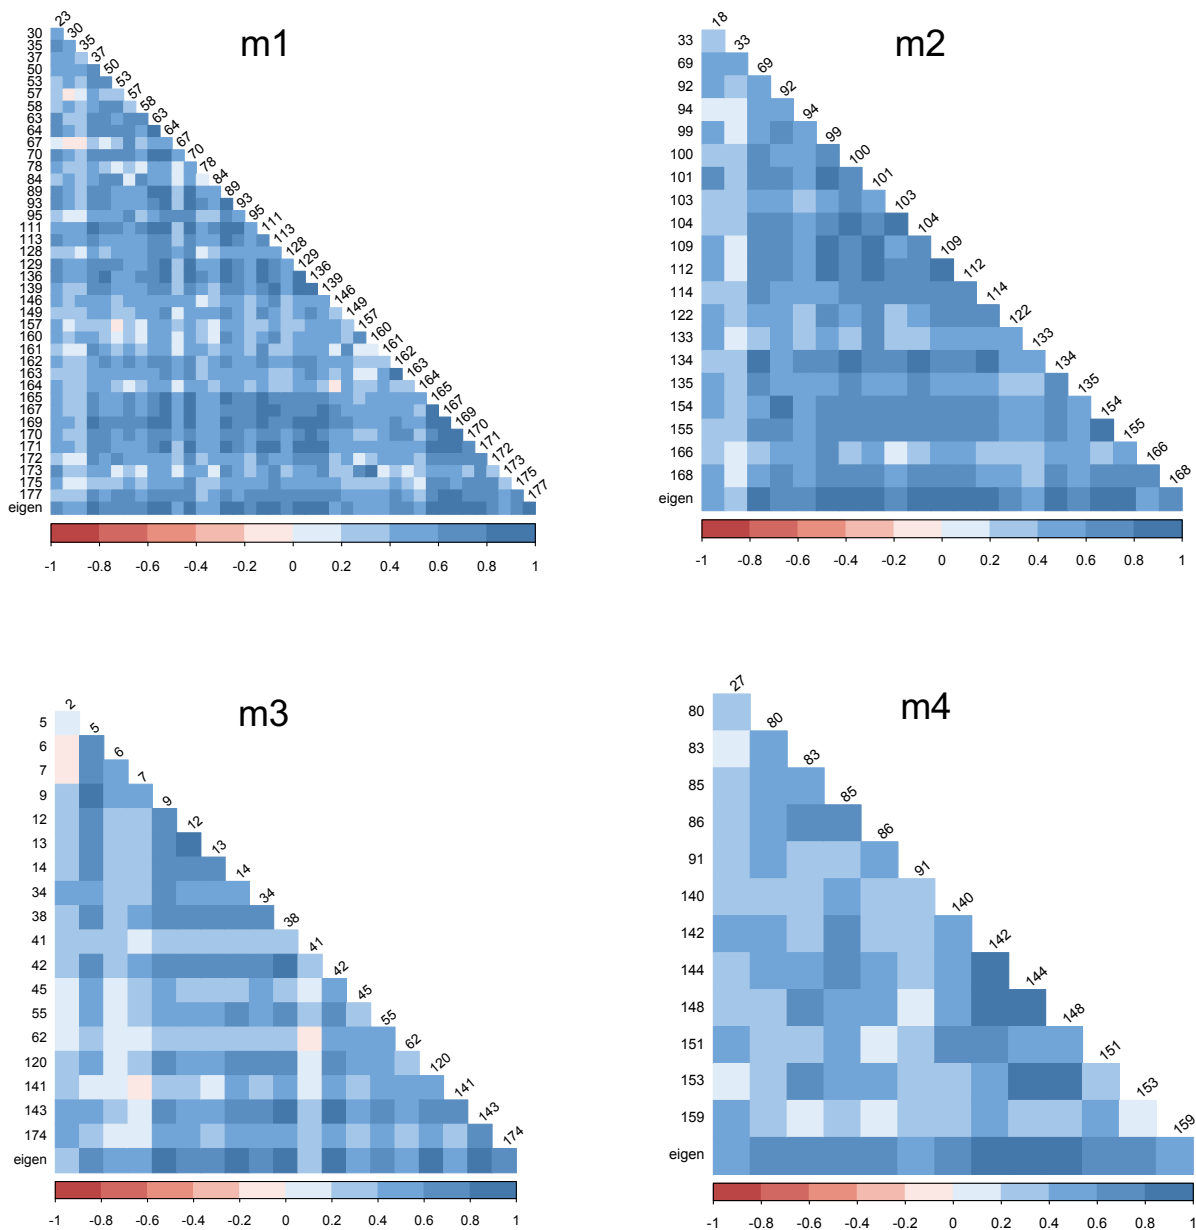

**Fig. S2a.** Pairwise correlations (as in Fig. S1), but among compounds within modules m1 to m4. The bottom row in each graph shows correlations among individual compounds and the eigenvector used in other analyses for the given module.

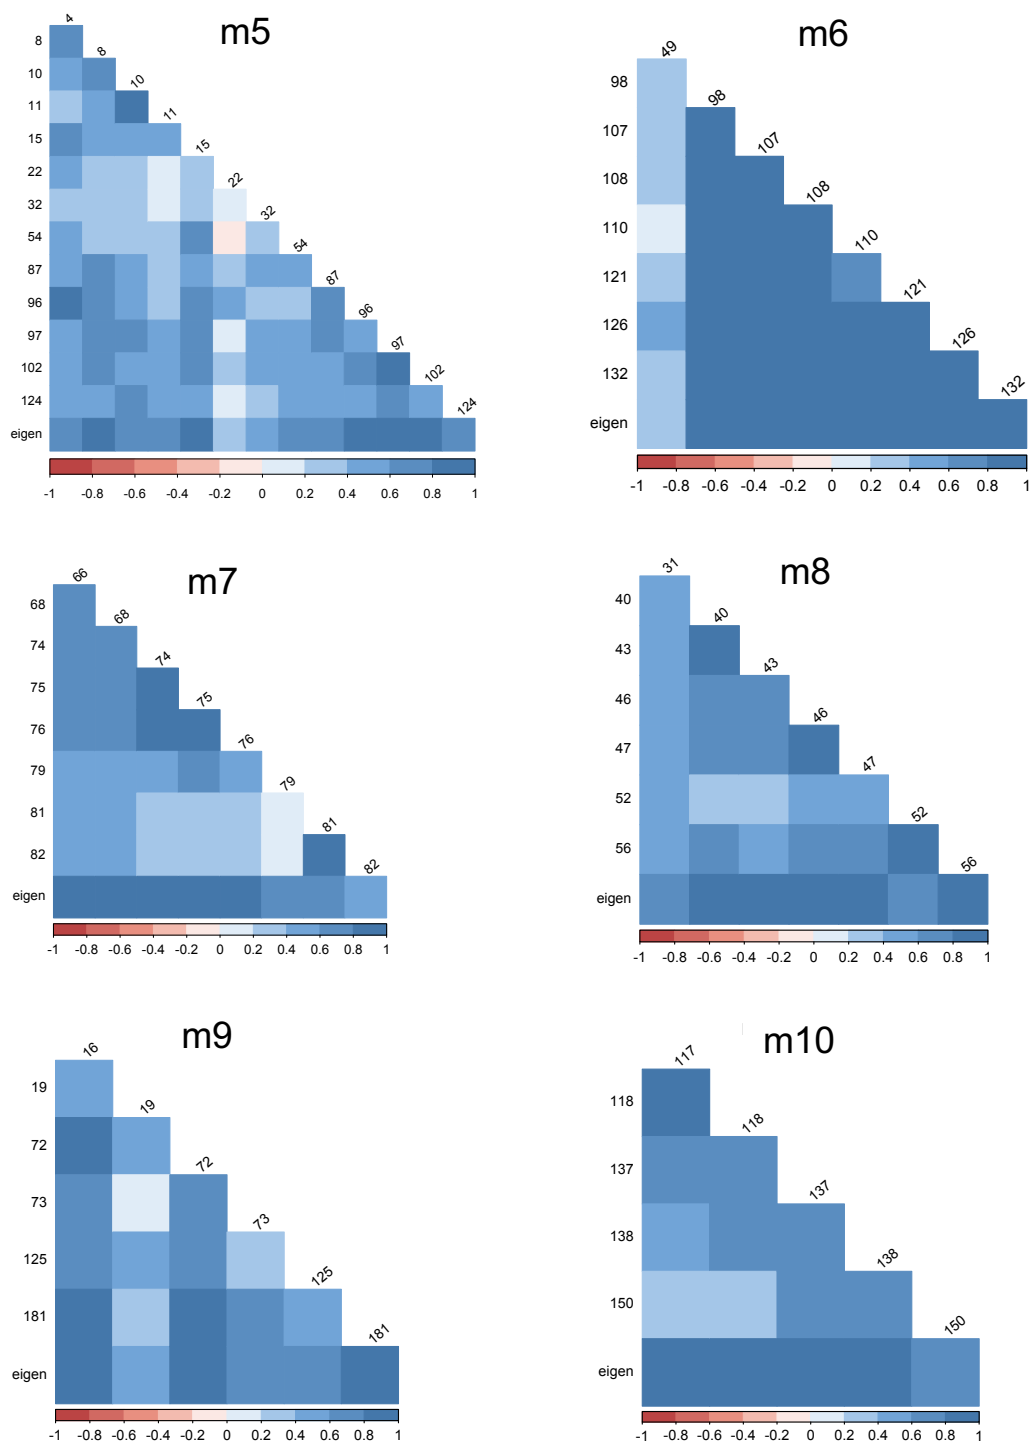

**Fig. S2b.** Pairwise correlations (as in Fig. S1), but among compounds within modules m5 to m10. The bottom row in each graph shows correlations among individual compounds and the eigenvector used in other analyses for the given module.

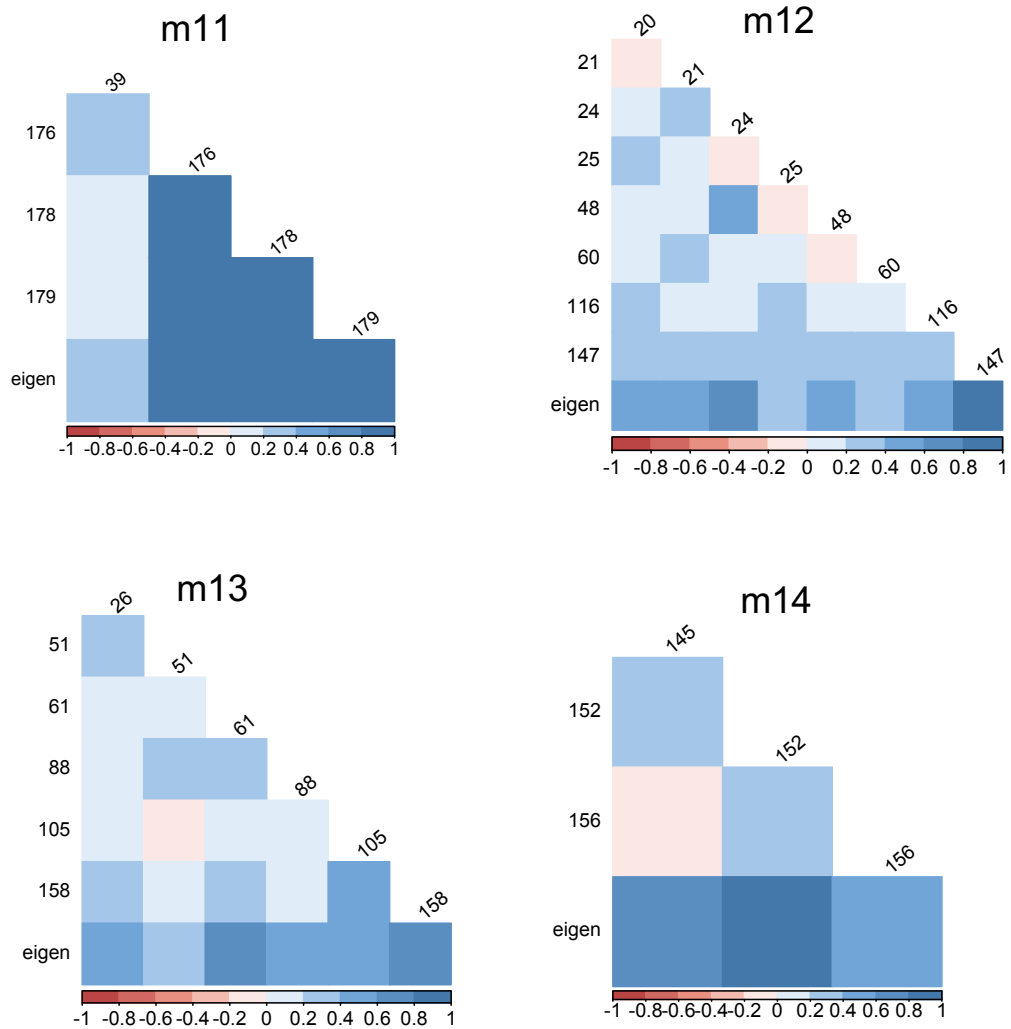

**Fig. S2c.** Pairwise correlations (as in Fig. S1), but among compounds within modules m11 to m14. The bottom row in each graph shows correlations among individual compounds and the eigenvector used in other analyses for the given module.

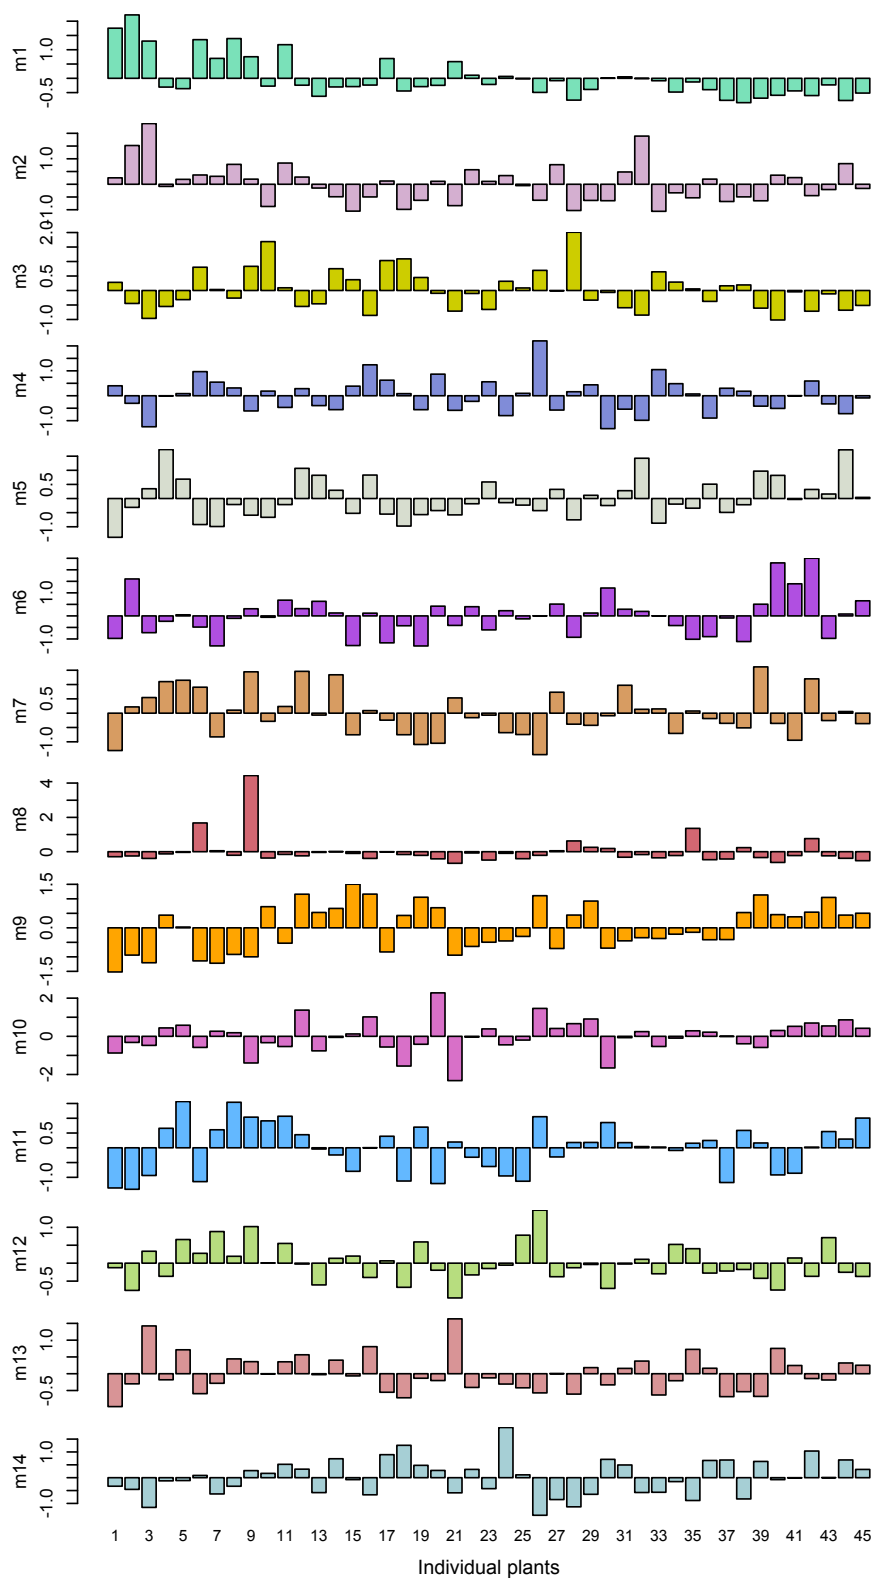

**Fig. S3.** Visualization of variation among plants (bars) in phytochemical modules. Each bar is the average of z-scores for compounds comprising a given module. Colors correspond to modules as in Fig. 1. The order of plants (along the x-axis) is arbitrary.

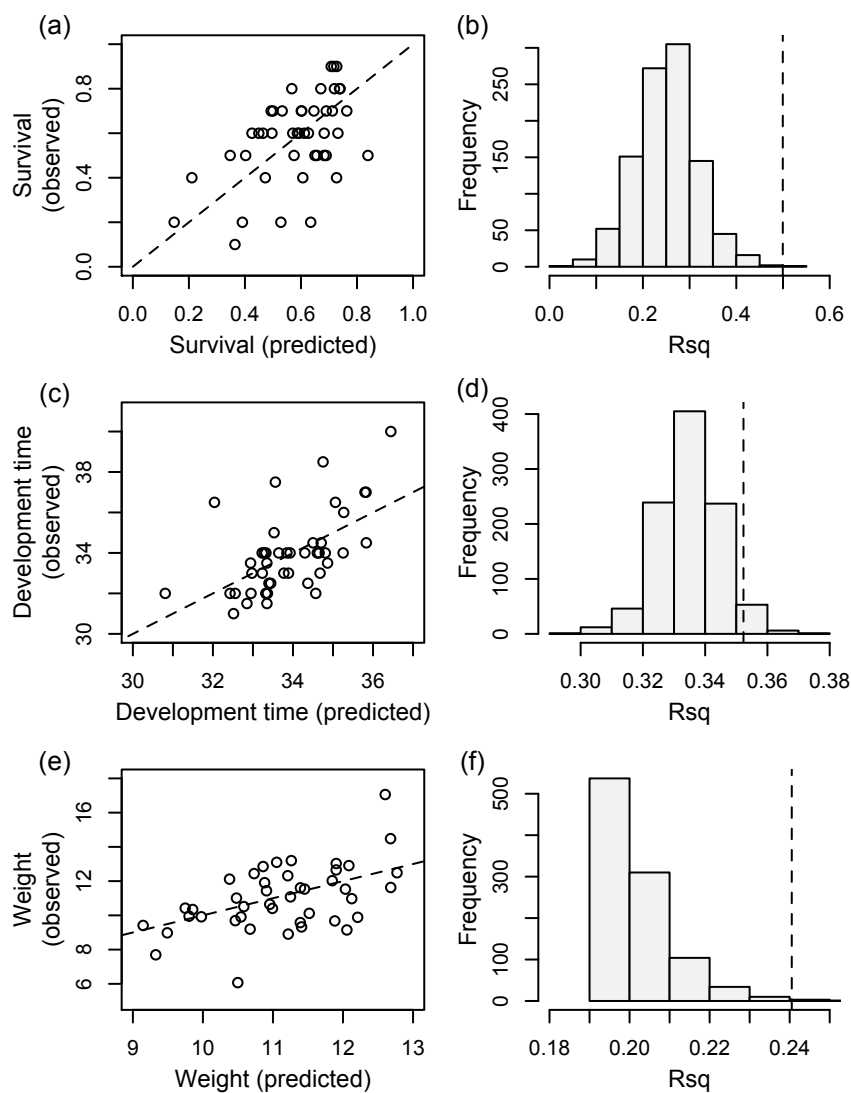

**Fig. S4.** Results from cross-validation (a, c, e) and resampling analysis (b, d, f) of Bayesian regressions reported in Table 1. In the observed vs predicted plots (a, c, e), each dot represents the observed and predicted performance of caterpillars associated with individual plants, which was the level at which cross-validation was conducted (i.e., one plant was left out of each iteration). In the resampling analyses (b, d, f), “modules” were constructed based on randomly assembled collections of compounds selected to match the structure of the initial analyses. For example, the survival regressions included modules 2, 3, 9, 10, and 11 (Table 1). Because m2 includes 21 compounds, for one iteration of the resampling analysis 21 compounds were randomly selected, from which the first eigenvector was taken for use in the analysis (and same for the other modules). From each of 1000 randomly-created sets of modules,  $R^2$  values were retained and summarized in plots (b, d, f), along with dashed lines representing the  $R^2$  values of empirical collections of compounds and associated eigenvectors. In all cases, the empirical models outperformed all but a tiny fraction of simulated models. The fraction of the simulated models with  $R^2$  values greater than the empirical models are as follows: 0.001 (b), 0.035 (d), and 0.002 (f).

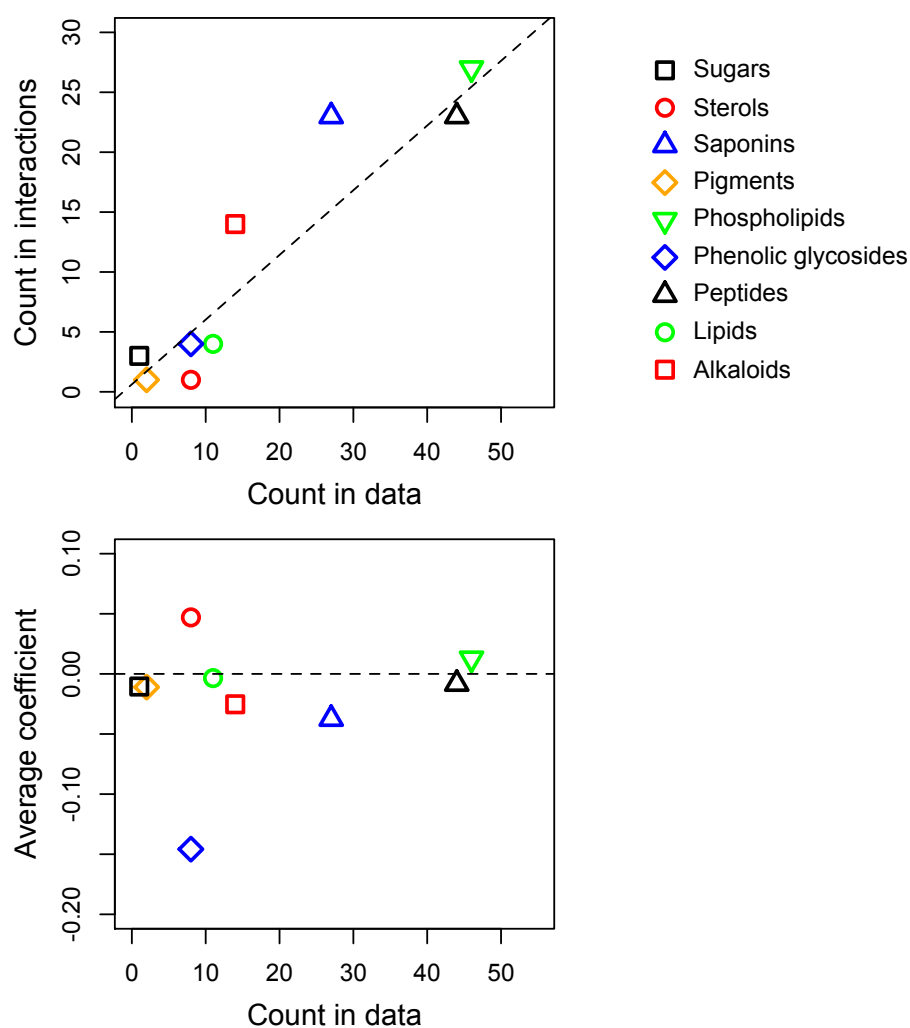

**Fig. S5.** Additional details on interactions by compound class. Top panel shows the number of times that compounds of a certain class appear in pairwise interactions (as in Supplemental Table S2) as a function of the total numbers of those compounds in different classes ("Count in data"). Classes that are represented by a greater number of distinct compounds in the total dataset are, in general, more likely to be observed in pairwise interactions: the dotted line shows the expected frequency of observation given random sampling from the total pool of compounds. Saponins and alkaloids are overrepresented in interactions, appearing in 44 and 41% (respectively) more pairwise interactions than expected by chance. Bottom panel shows average interaction coefficients for all interactions involving compounds of particular classes: most pairwise interactions are relatively small in magnitude, with the exception of interactions involving phenolic glycosides, that tend to be strongly negative. For both panels, interactions are considered from analyses of caterpillar survival and weight; no interactions were detected for development time (Supporting Information Table S2).

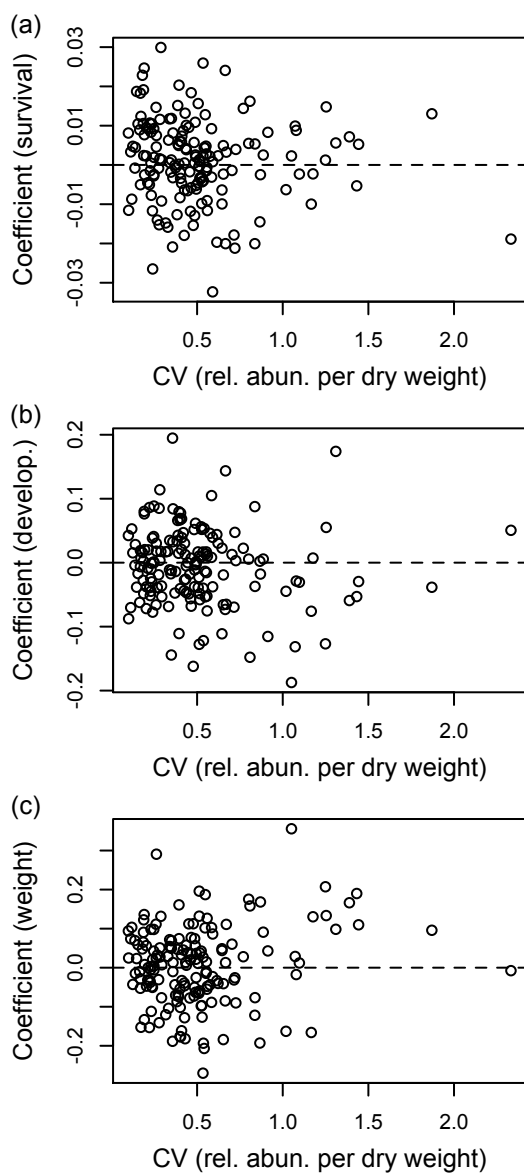

**Fig. S6.** Compound specific effects vs coefficients of variation for individual compounds. The compound specific effects based on ridge regression are the same as those listed in Table S1.
